# Supplementary material
Source: MDPI journal article supplement (https://www.mdpi.com/2311-7524/8/10/964)
Supplement: s1 [file s1 › horticulturae-1975269-supplementary.pdf]

# Supplementary Materials:

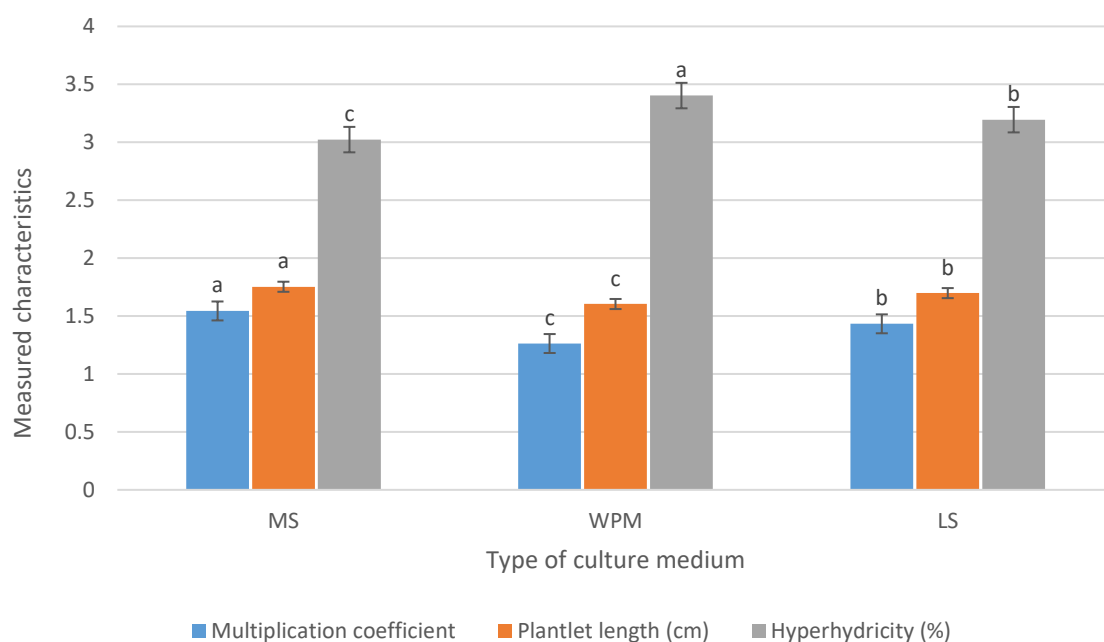

**Figure S1.** Effect of different culture media types on the measured characteristics of *Pyracantha angustifolia* plants grown *in vitro* in the multiplication step.

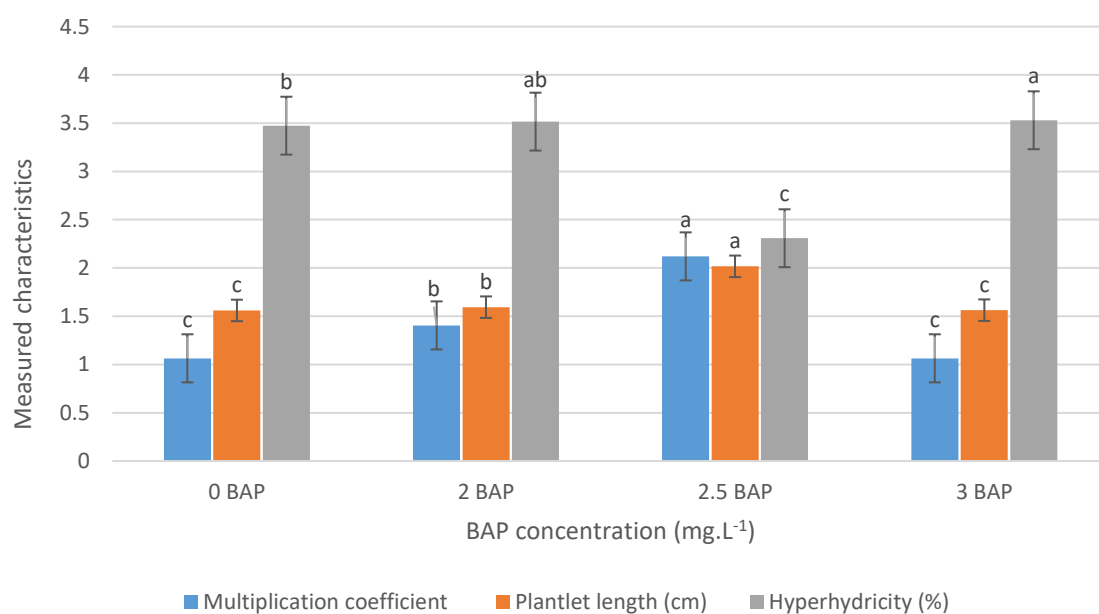

**Figure S2.** Effect of different concentrations of BAP on the measured characteristics of *Pyracantha angustifolia* plants grown *in vitro* in the multiplication step.

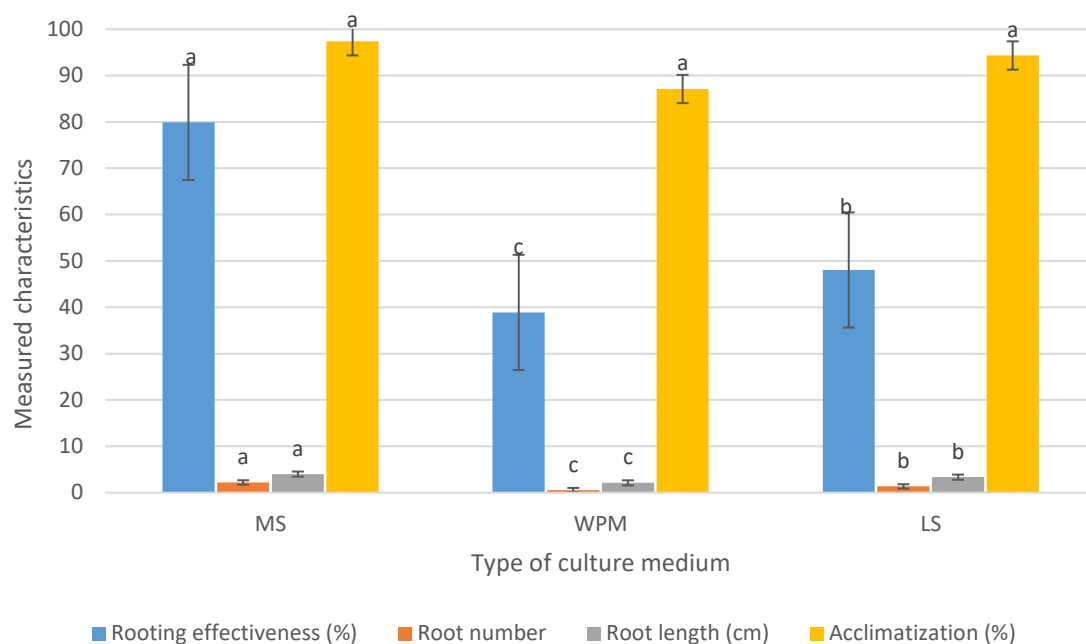

**Figure S3.** Effect of different culture media types on the measured characteristics of *Pyracantha angustifolia* plants grown *in vitro* in the rooting step.

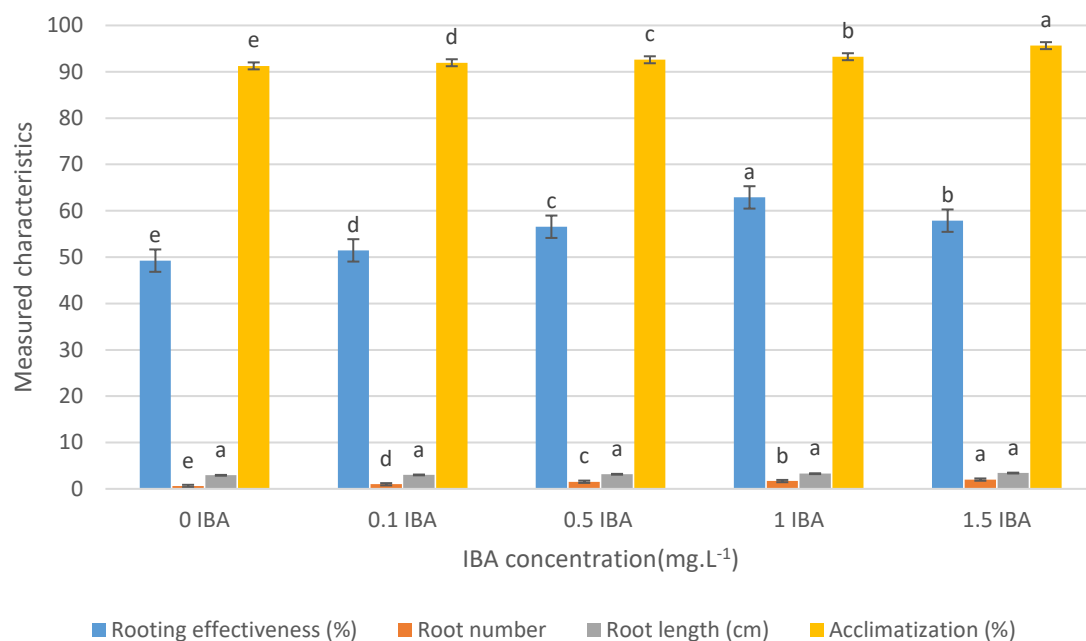

**Figure S4.** Effect of different concentrations of IBA on the measured characteristics of *Pyracantha angustifolia* plants grown *in vitro* in the rooting step.
